# Supplementary material for: A surprisingly mild and versatile method for palladium-catalyzed Suzuki cross-couplings of aryl chlorides in the presence of a triarylphosphineElectronic supplementary information (ESI) available: experimental procedures and compound characterization data. See http://www.rsc.org/suppdata/cc/b1/b107888g/
Source: Royal Society of Chemistry journal article supplement (doi:10.1039/b107888g), 2001-11-08
Supplement: b107888g.doc [file b107888g.doc]

A Surprisingly Mild and Versatile Method for Palladium-Catalyzed

Suzuki Cross-Couplings of Aryl Chlorides in the Presence of a Triarylphosphine

Shih-Yuan Liu, Michael J. Choi, and Gregory C. Fu*

*Department of Chemistry, Massachusetts Institute of Technology,*

*Cambridge, MA 02139*

Supporting Information

I. General

Sodium cyclopentadienide (Alfa Aesar; 2-3 M in THF), aqueous hydrogen peroxide (Alfa Aesar; 30%), diphenylphosphinic chloride (Avocado), FeCl2 (Strem; anhydrous), lithium pentamethylcyclopentadienide (Strem), diisopropylamine (Aldrich; 99.5%, redistilled), *n*-BuLi (Alfa Aesa; 2.6 M in hexanes), lithium aluminum hydride (Alfa; powder), chlorotrimethylsilane (Aldrich), Pd2(dba)3 (Aldrich), and Pd(OAc)2 (Strem) were used as received. *o*-Tolylboronic acid (Aldrich, Strem, or Frontier Scientific), 4-methoxyphenylboronic acid (Aldrich), and phenylboronic acid (Lancaster or Frontier Scientific) were recrystallized from water. Triphenylphosphine was recrystallized from ethanol. Potassium hydride (Strem) was washed with pentane three times and then dried under vacuum. All (hetero)aryl chlorides were purchased (Aldrich, Alfa-Aesar, and Lancaster) and distilled or recrystallized. K3PO4•H2O (Fluka) was ground to a fine powder and stored in a dry atmosphere. Tetrahydrofuran was passed through a neutral alumina column under argon or distilled from sodium benzophenone under nitrogen. Toluene was passed through a neutral alumina column under argon. Ligand **1** was synthesized according to the method of Simpkins.[[1]](#endnote-2)

II. Synthesis of Ligands 2 and 3

All yields are unoptimized.

Sodium cyclopentadienide (970 L, ~2.4 mmol; 2-3 M solution in THF) was added slowly to a stirred mixture of potassium hydride (106 mg, 2.60 mmol) and diphenylphosphinic chloride (573 mg, 2.40 mmol) in THF (10 mL). The reaction mixture was stirred for 70 min, at which time bubbling had ceased, and then it was filtered through an acrodisc and washed with THF (2 mL), furnishing a clear orange solution (solution A).

In a separate reaction vessel, a suspension of lithium pentamethylcyclopenta­dienide (312 mg, 2.20 mmol) in THF (8 mL) was added over 30 min to a vigorously stirred suspension of FeCl2 (280 mg, 2.20 mmol) in THF (10 mL), resulting in a clear green solution. Solution A was added to this stirred green solution, leading to an orange reaction mixture. The reaction mixture was stirred at room temperature for 24 h, and then it was filtered through a frit, washed with ether, and concentrated. The desired product was purified by column chromatography (ether), which afforded the desired compound as a yellow powder (277 mg, 28% yield).

1H NMR (500 MHz, C6D6): 7.88-7.84 (m, 4H), 7.04-7.02 (m, 6H), 4.04 (dd, *J* = 3.8 Hz, 2.0 Hz, 2H), 3.78 (dd, *J* = 3.8 Hz, 2.0 Hz, 2H), 1.81 (s, 15H). 13C NMR (125 MHz, C6D6): 137.4 (d, *J*PC = 103 Hz), 132.2 (d, 2*J*PC = 9.1 Hz), 131.3 (d, 3*J*PC = 2.3 Hz), 128.5, 82.4, 76.0 (d, 3*J*PC = 10.4 Hz), 74.8 (d, *J*PC = 119 Hz), 74.7 (d, 2*J*PC = 12.6 Hz), 11.8. 31P NMR (121 MHz, C6D6): 25.4. FTIR (neat) 3053, 2962, 2902, 1479, 1436, 1382, 1203, 1165, 1114, 1023 cm–1. HRMS (EI) Calcd for C27H29FePO: M+= 456.1300. Found 456.1311. mp 174-176 °C (decomp).

A cold (–35 °C) solution of LDA, generated in situ from diisopropylamine (60.9 mg, 0.600 mmol, in 1.7 mL of THF) and *n*-BuLi (230 L, 0.60 mmol; 2.6 M in hexane), was added to a cold (–35 ∞C) solution of **M** (229 mg, 0.500 mmol, in 6.8 mL of THF), resulting in a color change from yellow to red-orange. The reaction mixture was allowed to stir at –35 ∞C for 60 min, and then a solution of chlorotrimethylsilane (109 mg, 1.00 mmol, in 1 mL of THF) was added. The resulting mixture was stirred at –35 ∞C for 5 h and then at room temperature for 15 min. The solution was concentrated and subjected to column chromatography (1:1 hexanes:ether), which furnished 172 mg (65%) of the desired product as an orange solid.[[2]](#endnote-3)

1H NMR (500 MHz, C6D6): 8.10-8.06 (m, 2H), 7.63-7.59 (m, 2H), 7.13-7.07 (m, 3H), 6.94-6.93 (m, 3H), 4.03-4.02 (m, 1H), 4.01-4.00 (m, 1H), 3.93-3.91 (m, 1H), 1.75 (s, 15H), 0.38 (s, 9H). 13C NMR (125 MHz, C6D6): 139.4 (d, *J*PC = 101 Hz), 136.1 (d, *J*PC = 101 Hz), 133.1 (d, 2*J*PC = 9.3 Hz), 131.9 (d, *J*PC = 9.1 Hz), 131.2 (d, 3*J*PC = 8 Hz), 131.2 (d, *J*PC = 6.9 Hz), 128.5, 128.4, 83.5 (d, *J*PC = 12.6 Hz), 82.0, 79.8 (d, 3*J*PC = 17.1 Hz), 78.5 (d, *J*PC = 119 Hz), 77.63 (d, *J*PC = 10.3 Hz), 74.57 (d, 2*J*PC = 17.3 Hz), 12.0, 1.8. 31P NMR (121 MHz, C6D6): 25.3. FTIR (neat) 3052, 2948, 2899, 1479, 1437, 1380, 1243, 1202, 1171, 1113 cm–1. HRMS (EI) Calcd for C30H37FePOSi: M+= 528.1695. Found 528.1679. mp ~200 °C (decomp).

**Ligand 2.** An oven-dried Schlenk tube was charged with **N** (48 mg, 0.090 mmol), lithium aluminum hydride (4.1 mg, 0.11 mmol), benzene (0.8 mL), and then ether (0.5 mL). The reaction mixture was stirred at 90 ∞C for 3 h, and then it was concentrated. The residue was purified by column chromatography (hexane/ether gradient), which afforded 35 mg (76%) of the desired product as an orange solid.2**

1H NMR (500 MHz, C6D6): 7.84-7.80 (m, 2H), 7.27-7.24 (m, 2H), 7.12-7.07 (m, 3H), 7.00-6.93 (m, 3H), 3.98-3.97 (m, 1H), 3.93-3.92 (m, 1H), 3.85-3.84 (m, 1H), 1.72 (s, 15H), 0.34 (s, 9H). 13C NMR (125 MHz, C6D6): 142.8 (d, *J*PC = 12.6 Hz), 139.2 (d, *J*PC = 11.5 Hz), 137.2, 137.0, 133.6, 133.5, 129.7, 128.6, 81.8 (d, *J*PC = 8 Hz), 81.6 (d, *J*PC = 8 Hz), 80.8, 78.7 (d, *J*PC = 34 Hz), 78.3, 77.0 (d, 2*J*PC = 3.5 Hz), 12.1, 1.6. 31P NMR (121 MHz, C6D6): -23.1. FTIR (neat) 3066, 3050, 2947, 2899, 1477, 1433, 1379, 1245, 1177, 1027 cm–1. HRMS (EI) calcd for C30H37FePSi: M+= 512.1746. Found 512.1733. mp 155 °C.

**Ligand 3.** An oven-dried Schlenk tube was charged with **M** (45.7 mg, 0.100 mmol), lithium aluminum hydride (4.6 mg, 0.12 mmol), benzene (0.8 mL), and then ether (0.5 mL). The reaction mixture was stirred at 90 ∞C for 3 h., and then it was concentrated. The residue was purified by column chromatography (hexane/ether gradient), which afforded 39 mg (88%) of the desired product as a yellow solid.2**

1H NMR (500 MHz, C6D6): 7.60-7.56 (m, 4H), 7.08-7.02 (m, 6H), 3.78-3.77 (m, 2H), 3.69-3.68 (m, 2H), 1.79 (s, 15H). 13C NMR (125 MHz, C6D6): 141.0 (d, *J*PC = 13.8 Hz), 134.8 (d, *J*PC = 20.6 Hz), 129.0, 128.7, 81.1, 76.9 (d, *J*PC = 6.9 Hz), 75.2 (d, *J*PC = 3.5 Hz), 74.9 (d, *J*PC = 12.6 Hz), 11.9. 31P NMR (121 MHz, C6D6): -20.6. FTIR (neat) 2964, 2944, 2901, 2853, 1476, 1433, 1380, 1158, 1069, 1024 cm–1. HRMS (EI) calcd for C27H29FeP: M+= 440.1351. Found 440.1356. mp 156-158 °C.

III. Suzuki Cross-Coupling Reactions (Tables 1-3)

All Suzuki cross-coupling reactions were assembled under an inert atmosphere either in a screw-cap vial or in a resealable Schlenk tube (oven-dried). All GC yields (Table 1) have been corrected for response factors. Because the yields that are reported in Tables 1-3 are the average of two runs, the yields that are reported below for a specific experiment may differ from the values presented in the tables.

**Procedure A (Table 2).** In air, ligand **2**, Pd2(dba)3, the boronic acid, and K3PO4•H2O were added to an oven-dried Schlenk tube equipped with a stir bar. The Schlenk tube was fitted with a rubber septum, evacuated, and then refilled with argon. Half of the indicated volume of toluene was added via syringe, then the aryl chloride, and then the remaining volume of toluene. The mixture was stirred at room temperature for one hour and then heated to 70°C for 24 h. At the conclusion of the reaction, the mixture was diluted with ether, filtered through a pad of silica gel with copious washings, concentrated, and purified by column chromatography.

**Procedure B (Tables 1 and 2).** In a glove box, Pd2(dba)3, the boronic acid, and K3PO4•H2O were added to a Schlenk tube equipped with a stir bar. A toluene solution of the aryl chloride and the ligand was added. The mixture was stirred at room temperature for one hour and then heated to 70°C for 24 h. At the conclusion of the reaction, the mixture was diluted with ether, filtered through a pad of silica gel with copious washings, concentrated, and purified by column chromatography.

**Procedure C (Table 3).** In a glove box, Pd(OAc)2, ligand **2**, the boronic acid, and K3PO4•H2O were weighed into a 20-mL vial. Half of the indicated volume of toluene was added, then the aryl chloride, and then the remaining volume of toluene. The reaction was stirred at room temperature for 24 h, and then the mixture was diluted with ether, filtered through a pad of silica gel with copious washings, concentrated, and purified by column chromatography.

**Table 1, entry 1.** Procedure B was followed, using 4-chlorotoluene (23.4 mg, 0.185 mmol), *o*-tolylboronic acid (27.6 mg, 0.203 mmol), K3PO4•H2O (102 mg, 0.440 mmol), Pd2(dba)3 (2.5 mg, 0.0028 mmol), ligand **1** (4.9 mg, 0.011 mmol), and 0.44 mL of toluene. At the conclusion of the reaction, the internal standard tridecane (7.6 mg) was added. GC analysis revealed a 38% yield of the desired product.

**Table 1, entry 2.** Procedure B was followed, using 4-chlorotoluene (24.7 mg, 0.195 mmol), *o*-tolylboronic acid (29.2 mg, 0.215 mmol), K3PO4•H2O (108 mg, 0.469 mmol), Pd2(dba)3 (2.7 mg, 0.0029 mmol), ligand **2** (6.0 mg, 0.012 mmol), and 0.48 mL of toluene. At the conclusion of the reaction, the internal standard tridecane (23.2 mg) was added. GC analysis revealed an 87% yield of the desired product.

**Table 1, entry 3.** Procedure B was followed, using 4-chlorotoluene (24.0 mg, 0.189 mmol), *o*-tolylboronic acid (28.3 mg, 0.207 mmol), K3PO4•H2O (104 mg, 0.453 mmol), Pd2(dba)3 (2.6 mg, 0.0028 mmol), ligand **3** (5.0 mg, 0.011 mmol), and 0.43 mL of toluene. At the conclusion of the reaction, the internal standard tridecane (7.0 mg) was added. GC analysis revealed an 11% yield of the desired product.

**Table 1, entry 4.** Procedure B was followed, using 4-chlorotoluene (22.0 mg, 0.173 mmol), *o*-tolylboronic acid (26.0 mg, 0.191 mmol), K3PO4•H2O (96 mg, 0.42 mmol), Pd2(dba)3 (2.4 mg, 0.0026 mmol), triphenylphosphine (2.7 mg, 0.010 mmol), and 0.43 mL of toluene. At the conclusion of the reaction, the internal standard tetradecane (3.6 mg) was added. GC analysis revealed <2% yield of the desired product.

**2,4’-Dimethylbiphenyl (Table 2, entry 1). [611-61-0]** Procedure A was followed, using 4-chlorotoluene (63.3 mg, 0.500 mmol), *o*-tolylboronic acid (74.8 mg, 0.550 mmol), K3PO4•H2O (276 mg, 1.20 mmol), Pd2(dba)3 (6.9 mg, 0.0075 mmol), ligand **2** (15.4 mg, 0.0300 mmol), and 1.25 mL of toluene. At the conclusion of the reaction, workup and column chromatography (pentane) yielded 78.5 mg (86%) of the desired product as a colorless oil, which was contaminated with 1% (by 1H NMR) of 2,2’-dimethylbiphenyl.

1H NMR (CDCl3, 500 MHz):  7.25-7.22 (m, 8H), 2.40 (s, 3H), 2.28 (s, 3H). 13C NMR (CDCl3, 125 MHz):  141.8, 139.0, 136.3, 135.4, 130.3, 129.8, 129.0, 128.7, 127.0, 125.7, 21.2, 20.5.

**2-Phenyltoluene (Table 2, entry 2). [643-58-3]** Procedure A was followed, using 2-chlorotoluene (63.3 mg, 0.500 mmol), phenylboronic acid (67.1 mg, 0.550 mmol), K3PO4•H2O (276 mg, 1.20 mmol), Pd2(dba)3 (6.9 mg, 0.0075 mmol), ligand **2** (15.4 mg, 0.0300 mmol), and 1.25 mL of toluene. At the conclusion of the reaction, workup and column chromatography (pentane) yielded 75 mg (89%) of the desired product as a colorless oil, which was identical to authentic material (Aldrich) by 1H NMR, GC, and TLC.

**4-Methoxy-2’-methylbiphenyl (Table 2, entry 3). [92495-54-0]** Procedure A was followed, using 2-chlorotoluene (63.3 mg, 0.500 mmol), 4-methoxyphenylboronic acid (83.6 mg, 0.550 mmol), K3PO4•H2O (276 mg, 1.20 mmol), Pd2(dba)3 (6.9 mg, 0.0075 mmol), ligand **2** (15.4 mg, 0.0300 mmol), and 1.25 mL of toluene. At the conclusion of the reaction, the mixture was diluted with ether and filtered through a pad of silica gel with copious washings. Hydrogen peroxide (~3 mL; 30% aqueous) and water (~3 mL) were added [this modified workup procedure was needed because ligand **2** co-elutes with 4-methoxy-2’-methylbiphenyl]. The organic layer was then separated from the aqueous layer, dried over MgSO4, filtered, and concentrated. Column chromatography (1% ether in pentane) yielded 81.3 mg (82%) of the desired product as a colorless oil.

1H NMR (CDCl3, 500 MHz):  7.27-7.21 (m, 6H), 6.95 (d, *J* = 8.0 Hz, 2H), 3.85 (s, 3H), 2.28 (s, 3H). 13C NMR (CDCl3, 125 MHz):  158.7, 141.7, 135.7, 134.6, 130.50, 130.46, 130.1, 127.2, 126.0, 113.7, 55.5, 20.8.

**2,2’-Dimethylbiphenyl (Table 2, entry 4). [605-39-0]** Procedure A was followed, using 2-chlorotoluene (63.3 mg, 0.500 mmol), *o*-tolylboronic acid (74.8 mg, 0.550 mmol), K3PO4•H2O (276 mg, 1.20 mmol), Pd2(dba)3 (6.9 mg, 0.0075 mmol), ligand **2** (15.4 mg, 0.0300 mmol), and 1.25 mL of toluene. At the conclusion of the reaction, workup and column chromatography (pentane) yielded 83.9 mg (92%) of the desired product as a colorless oil, which was identical to authentic material (TCI) by 1H NMR, GC, and TLC.

**2,6,2’-Trimethylbiphenyl (Table 2, entry 5). [10273-87-7]** Procedure A was followed, using 2-chloro-*m*-xylene (70.3 mg, 0.500 mmol), *o*-tolylboronic acid (74.8 mg, 0.550 mmol), K3PO4•H2O (276 mg, 1.20 mmol), Pd2(dba)3 (6.9 mg, 0.0075 mmol), ligand **2** (15.4 mg, 0.0300 mmol), and 1.25 mL of toluene. At the conclusion of the reaction, workup and column chromatography (pentane) yielded 93.3 mg (95%) of the desired product as a colorless oil.

1H NMR (CDCl3, 500 MHz):  7.31-7.09 (m, 6H), 7.03-6.99 (m, 1H), 1.97 (s, 3H), 1.94 (s, 6H). 13C NMR (CDCl3, 125 MHz):  141.3, 140.7, 136.1, 135.8, 130.2, 129.0, 127.4, 127.2, 127.1, 126.2, 20.6, 19.6.

**4-Methoxy-2’-methylbiphenyl (Table 2, entry 6). [92495-54-0]** Procedure A was followed, using 4-chloroanisole (71.3 mg, 0.500 mmol), *o*-tolylboronic acid (74.8 mg, 0.550 mmol), K3PO4•H2O (276 mg, 1.20 mmol), Pd2(dba)3 (6.9 mg, 0.0075 mmol), ligand **2** (15.4 mg, 0.0300 mmol), and 1.25 mL of toluene. At the conclusion of the reaction, the mixture was diluted with ether and filtered through a pad of silica gel with copious washings. Hydrogen peroxide (~3 mL; 30% aqueous) and water (~3 mL) were added [this modified workup procedure was needed because ligand **2** co-elutes with 4-methoxy-2’-methylbiphenyl]. The organic layer was then separated from the aqueous layer, dried over MgSO4, filtered, and concentrated. Column chromatography (1% ether in pentane) yielded 87.6 mg (88%) of the desired product as a colorless oil.

1H NMR (CDCl3, 500 MHz):  7.27-7.21 (m, 6H), 6.95 (d, *J* = 8.0 Hz, 2H), 3.85 (s, 3H), 2.28 (s, 3H). 13C NMR (CDCl3, 125 MHz):  158.7, 141.7, 135.7, 134.6, 130.50, 130.46, 130.1, 127.2, 126.0, 113.7, 55.5, 20.8.

**4-Acetyl-2’-methylbiphenyl (Table 3, entry 1).**  **[56917-39-6]** Procedure C was followed, using 4-chloracetophenone (100 mg, 0.647 mmol), *o*-tolylboronic acid (96.6 mg, 0.711 mmol), K3PO4•H2O (355 mg, 1.55 mmol), Pd(OAc)2 (7.3 mg, 0.033 mmol), ligand **2** (19.9 mg, 0.0390 mmol), and toluene (1.62 mL). After 24 h at room temperature, workup and column chromatography (30% CH2Cl2 in hexane) yielded 120 mg (90%) of the title compound as a clear yellow liquid.

1H NMR (CDCl3, 500 MHz):  8.01 (d, *J* = 8.7 Hz, 2H), 7.43 (d, *J* = 8.7 Hz, 2H), 7.30-7.20 (m, 4H), 2.65 (s, 3H), 2.27 (s, 3H). 13C NMR (CDCl3, 75 MHz):  198.6, 147.7, 141.4, 136.3, 135.9, 131.3, 130.22, 130.18, 128.9, 128.6, 126.7, 27.4, 21.3.

**2-Phenylpyridine (Table 3, entry 2). [121697-60-7]** Procedure C was followed, using 2-chloropyridine (100 mg, 0.881 mmol), phenylboronic acid (118 mg, 0.968 mmol), K3PO4•H2O (483 mg, 2.11 mmol), Pd(OAc)2 (9.9 mg, 0.044 mmol), ligand **2** (27.1 mg, 0.0520 mmol), and toluene (2.2 mL). After 24 h at room temperature, workup and column chromatography (30% ether in hexane) yielded 121 mg (93%) of the title compound as a clear yellow liquid.

1H NMR (CDCl3, 500 MHz):  8.71 (ddd, *J* = 1.0 Hz, 1.7 Hz, 4.9 Hz, 1H), 8.01 (m, 2H), 7.75 (m, 2H), 7.50 (m, 2H), 7.44 (m, 1H), 7.23 (m, 1H). 13C NMR (CDCl3, 75 MHz):  158.1, 150.3, 140.0, 137.5, 129.7, 129.5, 127.6, 122.8, 121.3.

**2'-Methyl-biphenyl-2-carbonitrile (Table 3, entry 3). [157366-46-6]** Procedure C was followed, using 2-chlorophenylnitrile (100 mg, 0.727 mmol), *o*-tolylboronic acid (109 mg, 0.802 mmol), K3PO4•H2O (398 mg, 1.74 mmol), Pd(OAc)2 (8.2 mg, 0.037 mmol), ligand **2** (22.3 mg, 0.0440 mmol), and toluene (1.8 mL). After 24 h at room temperature, workup and column chromatography (10% ether in hexane) yielded 126 mg (97%) of the title compound as a clear yellow liquid.

1H NMR (CDCl3, 500 MHz):  7.76 (dd, *J* = 1 Hz, 7.5 Hz, 1H), 7.65 (dt, *J* =1.5 Hz, 7.5 Hz, 1H), 7.45 (dt, *J* =1.2 Hz, 7.7 Hz, 1H), 7.40-7.21 (m, 5H), 2.21 (s, 3H). 13C NMR (CDCl3, 75 MHz):  146.6, 138.7, 136.4, 133.6, 133.1, 131.2, 131.1, 130.2, 129.5, 128.3, 126.6, 118.9, 113.6, 20.6.

References

1. (?) Price, D.; Simpkins, N. S. *Tetrahedron Lett.* **1995**, *36*, 6135-6136. [↑](#endnote-ref-2)
2. (?) This procedure was adapted from Reference 1.** [↑](#endnote-ref-3)
